# Supplementary material for: Genomic microsatellites identify shared Jewish ancestry intermediate between Middle Eastern and European populations
Source: Springer Nature journal article supplement (doi:10.1186/1471-2156-10-80), 2009-12-01
Supplement: 12863_2009_738_MOESM2_ESM.pdf [file 12863_2009_738_MOESM2_ESM.pdf]

Middle Eastern

Jewish

European

K=2

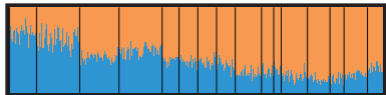

K=3

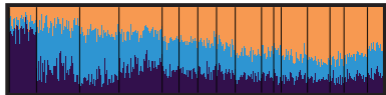

K=4

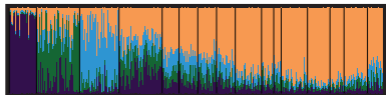

K=5

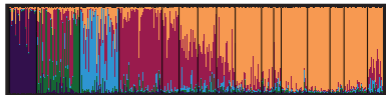

K=6

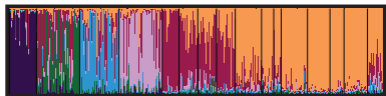

Mozabite

Bedouin

Druze

Palestinian

Tunisian

Moroccan

Turkish

Ashkenazi

Sardinian

Italian  
Tuscan

French

Basque

Orcadian

Russian

Adygei
