# Supplementary figures and images for: Genomic microsatellites identify shared Jewish ancestry intermediate between Middle Eastern and European populations
Source: Springer Nature journal article supplement (doi:10.1186/1471-2156-10-80), 2009-12-01

A

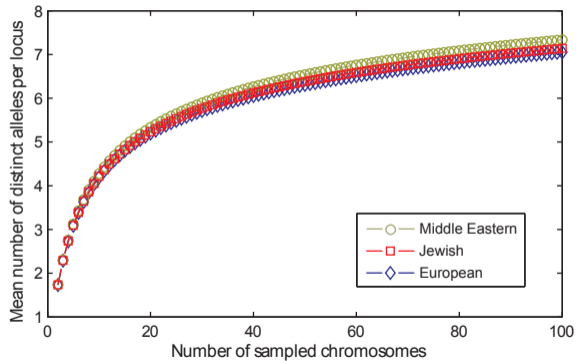

B

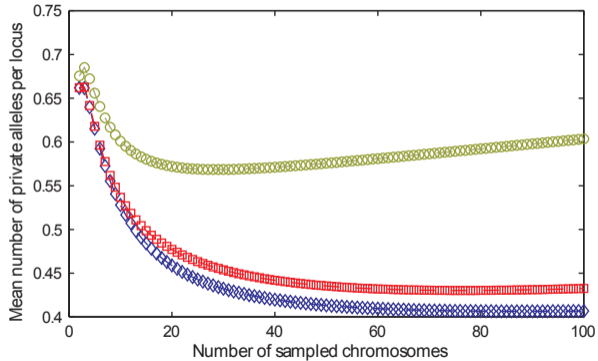

Supplement: 12863_2009_738_MOESM1_ESM.pdf [file 12863_2009_738_MOESM1_ESM.pdf]

A

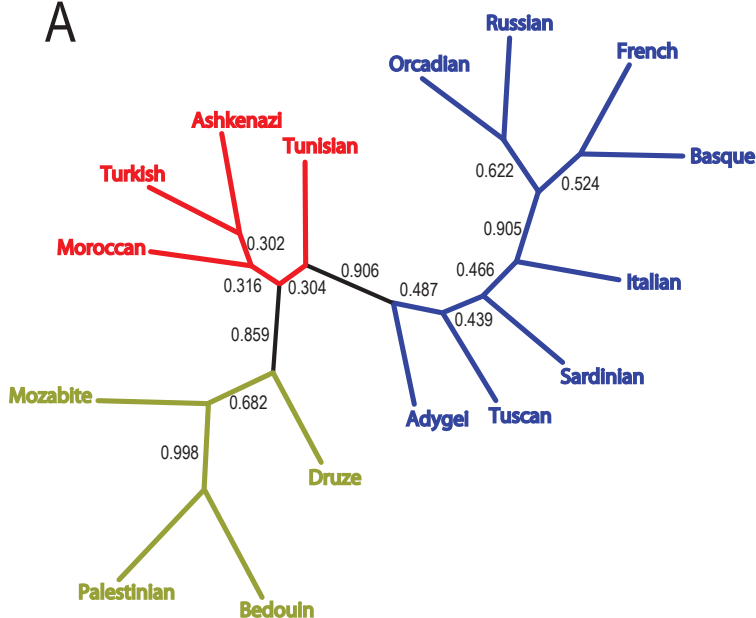

B

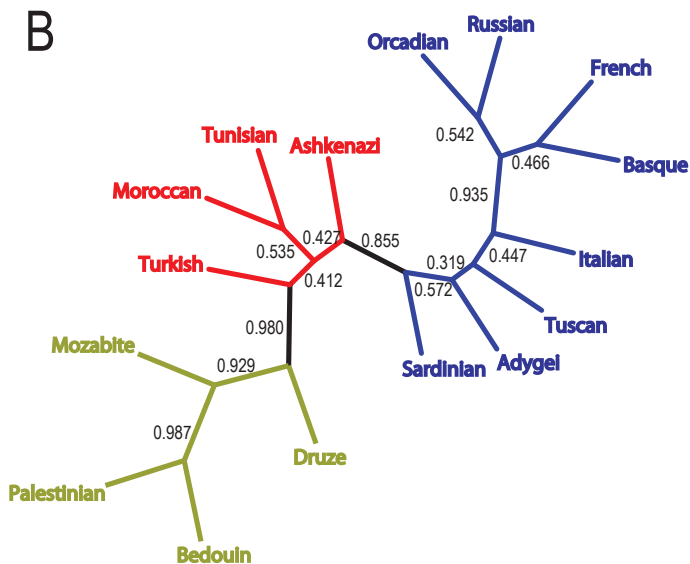

C

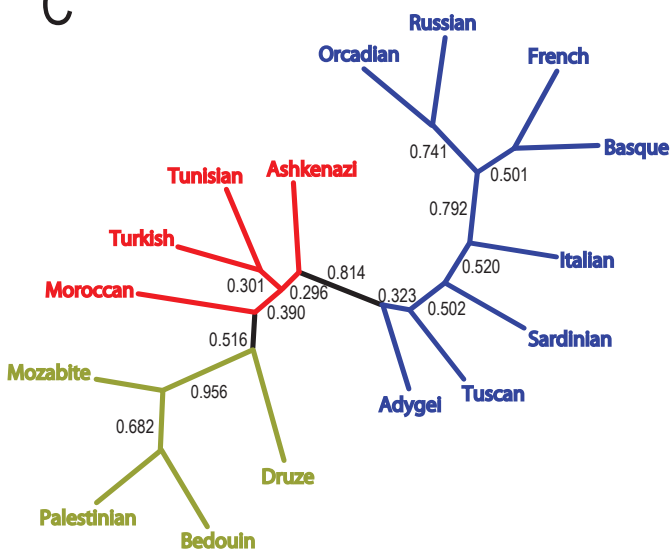

Supplement: 12863_2009_738_MOESM3_ESM.pdf [file 12863_2009_738_MOESM3_ESM.pdf]

A

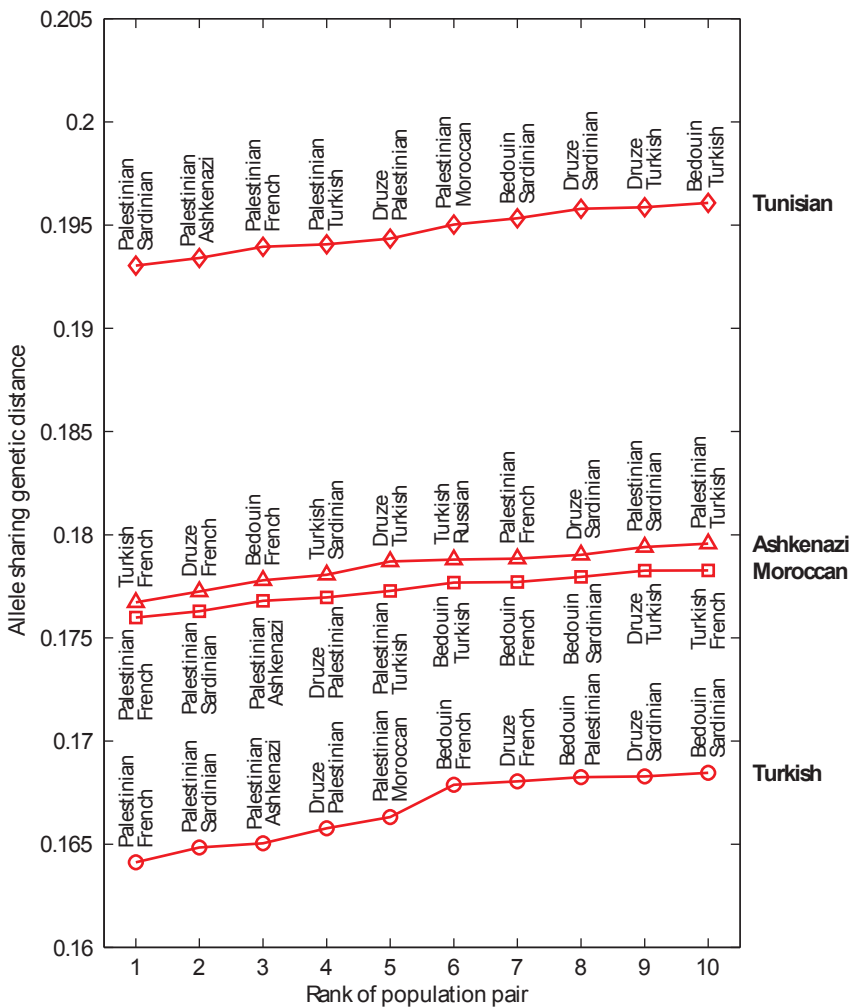

B

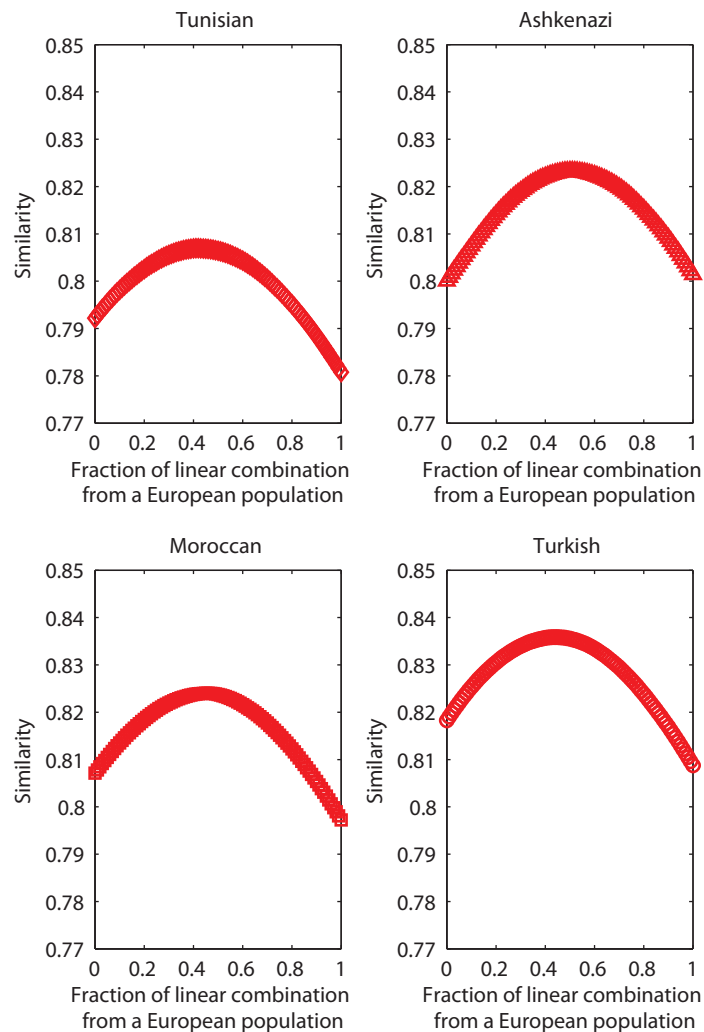

Supplement: 12863_2009_738_MOESM4_ESM.pdf [file 12863_2009_738_MOESM4_ESM.pdf]

A

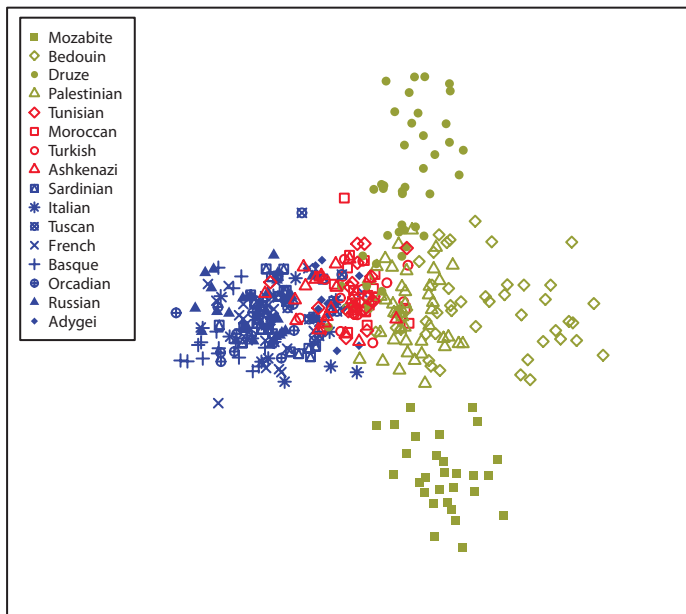

B

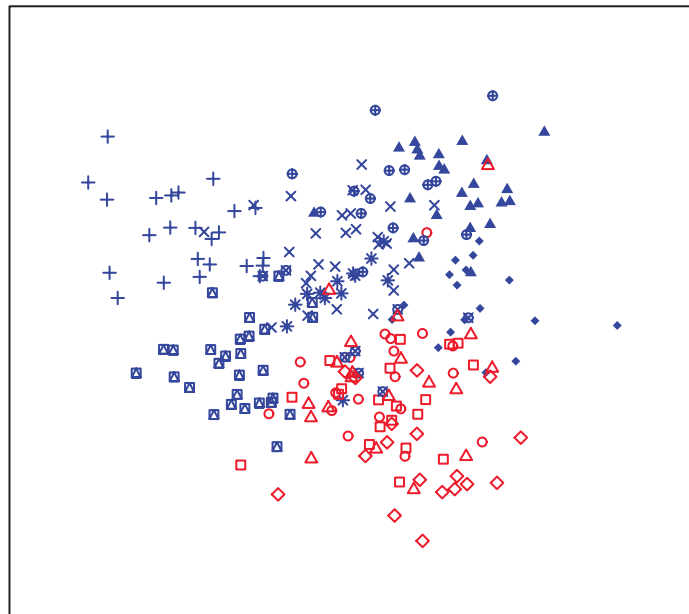

C

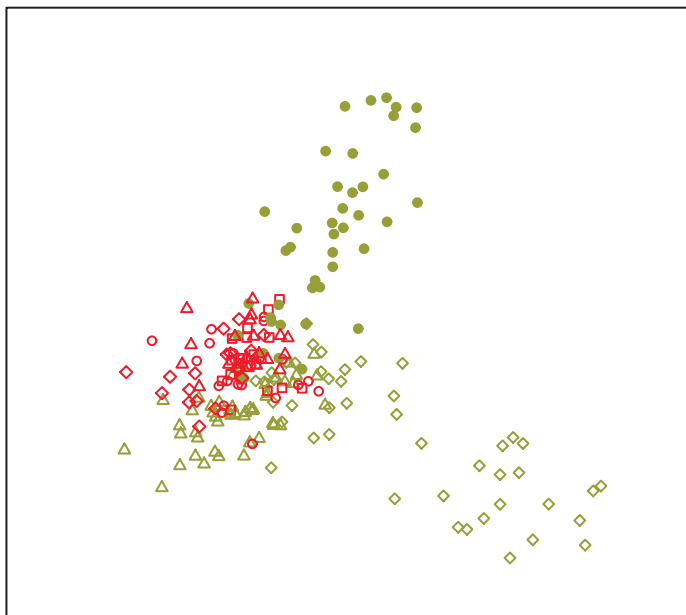

D

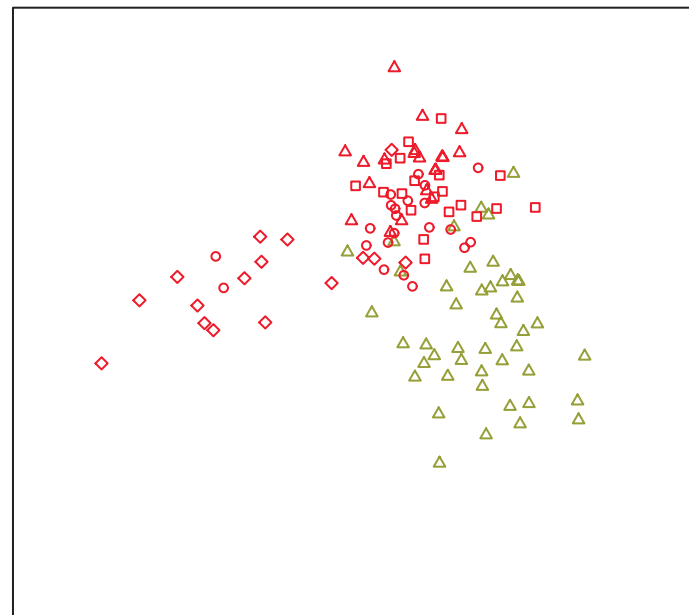

Supplement: 12863_2009_738_MOESM5_ESM.pdf [file 12863_2009_738_MOESM5_ESM.pdf]

A

K=2

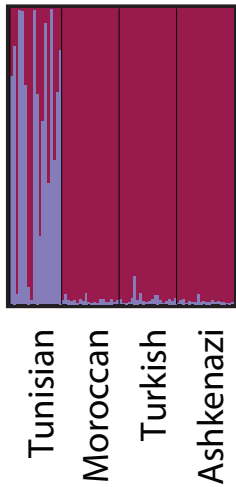

B

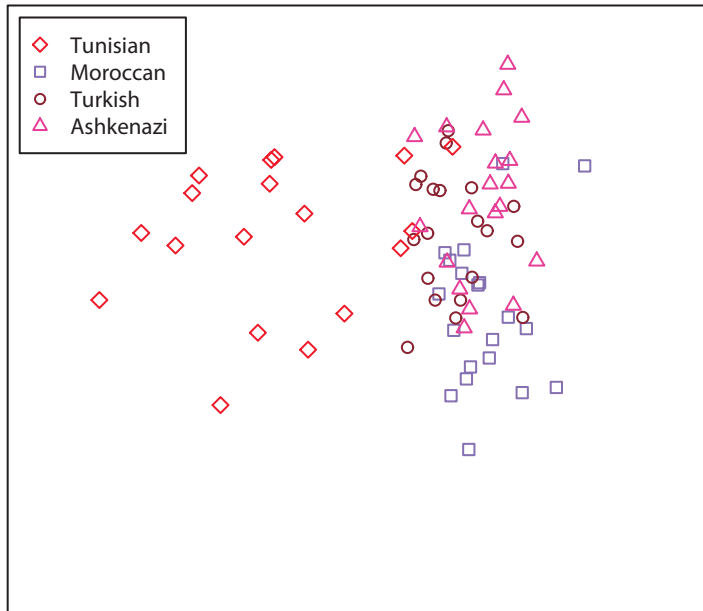

Supplement: 12863_2009_738_MOESM6_ESM.pdf [file 12863_2009_738_MOESM6_ESM.pdf]
